# Supplementary material
Source: publisher figshare collection journal article supplement (https://acs.figshare.com/ndownloader/files/4172659)
Supplement: Supplementary file 1 [file 4172659]

# Practical and Scalable Synthesis of S1P<sub>1</sub> Receptor Agonist ACT-209905

*Gunther Schmidt,\* Stefan Reber, Martin H. Bolli, and Stefan Abele*

Process Research Chemistry, Actelion Pharmaceuticals Ltd., Gewerbestrasse 16, CH-4123 Allschwil,  
Switzerland

\* Corresponding author. E-Mail: [Gunther.schmidt@actelion.com](mailto:Gunther.schmidt@actelion.com). Telephone: +41 61 565 80 28.

## Table of content:

|                                                                               |               |
|-------------------------------------------------------------------------------|---------------|
| 1. Analytical methods                                                         | pages S 2-4   |
| 2. Representative spectra or chromatograms:                                   |               |
| <b>21</b> ( <sup>1</sup> H NMR)                                               | page S 5      |
| <b>25</b> ( <sup>1</sup> H NMR )                                              | page S 6      |
| <b>26</b> ( <sup>1</sup> H NMR)                                               | page S 7      |
| <b>6</b> ( <sup>1</sup> H NMR, <sup>13</sup> C NMR)                           | page S 8      |
| <b>31</b> ( <sup>1</sup> H NMR)                                               | page S 9      |
| <b>10</b> ( <sup>1</sup> H NMR)                                               | page S 10     |
| <b>11</b> ( <sup>1</sup> H NMR, <sup>13</sup> C NMR)                          | pages S 11-12 |
| <b>12</b> ( <sup>1</sup> H NMR)                                               | page S 13     |
| <b>13</b> ( <sup>1</sup> H NMR)                                               | page S 14     |
| <b>1</b> ( <sup>1</sup> H and <sup>13</sup> C NMR, HPLC, DSC)                 | pages S 15-19 |
| 3. Examples of procedures on 400-L scale ( <b>6</b> , <b>11</b> , <b>12</b> ) | pages S 20-21 |

## 1. Analytical methods

### LC-MS method:

Agilent G1956B (MS, Ionisation: ESI+, APCI), Agilent G1312B Bin Pump, Agilent G1315C DAD, Agilent G1316B (thermostated column compartment), Agilent G1367C (auto sampler)

Injection volume: 2  $\mu$ L

Column: Zorbax SB C18, 1.8  $\mu$ m, 2.1 x 50 mm

Column flow: 1 mL/min

Eluent: Eluent A: Water, 0.08% TFA (trifluoroacetic acid)

Eluent B: Acetonitrile, 0.012% TFA

Gradient: 2.0 min 95% B

2.8 min 95% B

3.0 min 5% B

Pressure: 520 bar

Temperature: 75 °C

Detection wavelength: 210 nm

## HPLC method 1:

HPLC system Agilent 1100 with data acquisition (Chemstation Plus)

| Injection volume:            | 5 µL                                                                                                                                                                                                                                                                     |      |     |       |     |        |     |        |    |        |    |          |     |        |     |
|------------------------------|--------------------------------------------------------------------------------------------------------------------------------------------------------------------------------------------------------------------------------------------------------------------------|------|-----|-------|-----|--------|-----|--------|----|--------|----|----------|-----|--------|-----|
| Column:                      | Zorbax Eclipse XDB C18, 3.5 µm, 150 mm x 4.6 mm                                                                                                                                                                                                                          |      |     |       |     |        |     |        |    |        |    |          |     |        |     |
| Column flow:                 | 1.2 mL/min                                                                                                                                                                                                                                                               |      |     |       |     |        |     |        |    |        |    |          |     |        |     |
| Eluent:                      | Eluent A: 950 mL water, pH = 2 (ca. 350-400 µl H <sub>2</sub> SO <sub>4</sub> 95%)<br>+ 50 mL acetonitrile<br><br>Eluent B: 950 ml acetonitrile + 50 mL water + 350-400 µl<br>H <sub>2</sub> SO <sub>4</sub> 95%                                                         |      |     |       |     |        |     |        |    |        |    |          |     |        |     |
| Gradient mode:               | <table><tr><th>Time</th><th>% A</th></tr><tr><td>0 min</td><td>80%</td></tr><tr><td>15 min</td><td>50%</td></tr><tr><td>20 min</td><td>5%</td></tr><tr><td>25 min</td><td>5%</td></tr><tr><td>25.1 min</td><td>80%</td></tr><tr><td>30 min</td><td>80%</td></tr></table> | Time | % A | 0 min | 80% | 15 min | 50% | 20 min | 5% | 25 min | 5% | 25.1 min | 80% | 30 min | 80% |
| Time                         | % A                                                                                                                                                                                                                                                                      |      |     |       |     |        |     |        |    |        |    |          |     |        |     |
| 0 min                        | 80%                                                                                                                                                                                                                                                                      |      |     |       |     |        |     |        |    |        |    |          |     |        |     |
| 15 min                       | 50%                                                                                                                                                                                                                                                                      |      |     |       |     |        |     |        |    |        |    |          |     |        |     |
| 20 min                       | 5%                                                                                                                                                                                                                                                                       |      |     |       |     |        |     |        |    |        |    |          |     |        |     |
| 25 min                       | 5%                                                                                                                                                                                                                                                                       |      |     |       |     |        |     |        |    |        |    |          |     |        |     |
| 25.1 min                     | 80%                                                                                                                                                                                                                                                                      |      |     |       |     |        |     |        |    |        |    |          |     |        |     |
| 30 min                       | 80%                                                                                                                                                                                                                                                                      |      |     |       |     |        |     |        |    |        |    |          |     |        |     |
| Pressure:                    | 160 bar                                                                                                                                                                                                                                                                  |      |     |       |     |        |     |        |    |        |    |          |     |        |     |
| Temperature:                 | 25 °C                                                                                                                                                                                                                                                                    |      |     |       |     |        |     |        |    |        |    |          |     |        |     |
| Detection wavelength:        | 255 nm                                                                                                                                                                                                                                                                   |      |     |       |     |        |     |        |    |        |    |          |     |        |     |
| Retention time of <b>1</b> : | 7.6 min                                                                                                                                                                                                                                                                  |      |     |       |     |        |     |        |    |        |    |          |     |        |     |

## HPLC method 2:

HPLC system Agilent 1100 with data acquisition (Chemstation Plus)

|                               |                                                                                            |
|-------------------------------|--------------------------------------------------------------------------------------------|
| Injection volume:             | 5 $\mu$ L                                                                                  |
| Column:                       | Daicel ChiralPak AD-H, 5 $\mu$ m, 250 mm x 4.6 mm                                          |
| Column flow:                  | 0.8 mL/min                                                                                 |
| Eluent:                       | Add 1 mL diethylamine to 1 L ethanol. 150 mL of this<br>solution + 850 mL <i>n</i> -hexan. |
| Gradient mode:                | Isocratic                                                                                  |
| Chromatogram Time:            | 20 min                                                                                     |
| Pressure:                     | 35 bar                                                                                     |
| Temperature:                  | 25 °C                                                                                      |
| Detection wavelength:         | 230 nm                                                                                     |
| Retention time of <b>1</b> :  | 12 min                                                                                     |
| Retention time of <b>13</b> : | 5.8 min                                                                                    |

## 2. Representative spectra

$^1\text{H}$  NMR spectrum of methyl 3-cyano-2-hydroxy-6-methyl-isonicotinate **21** (in  $\text{D}_6$  DMSO).

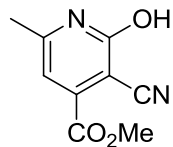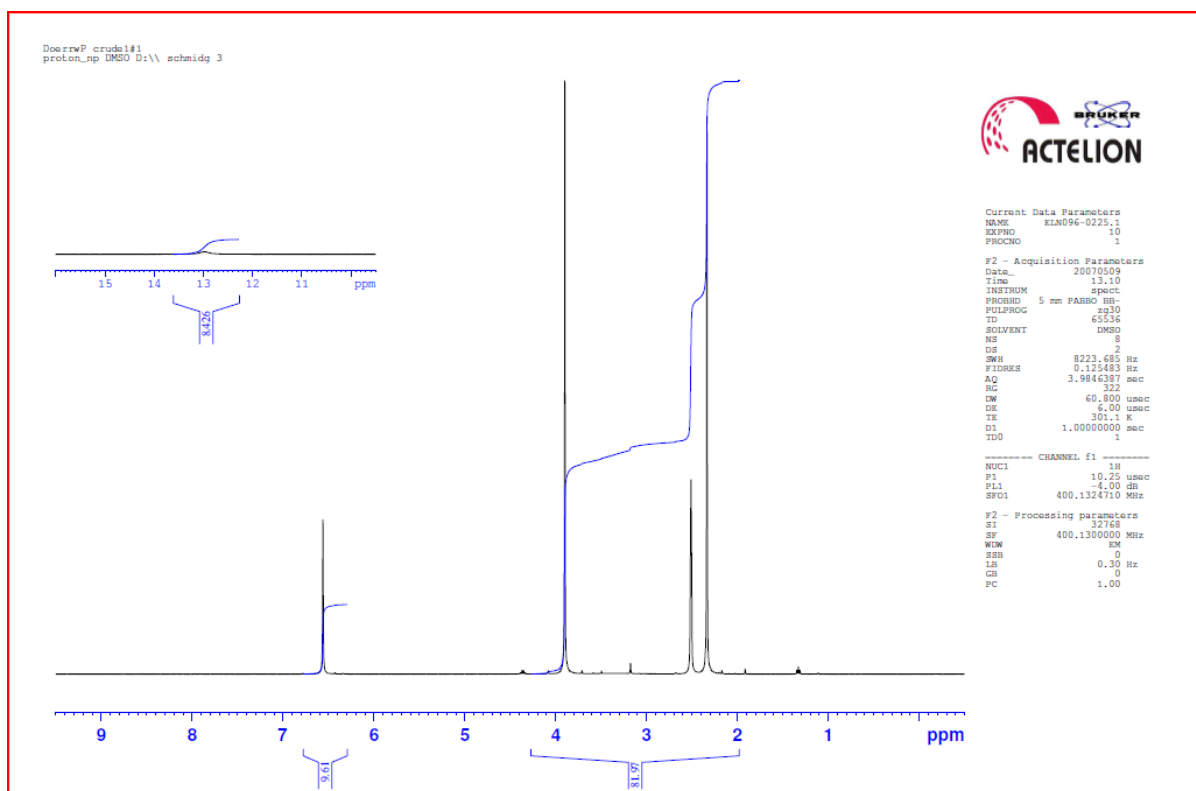

$^1\text{H}$  NMR spectrum of 2-hydroxy-6-methylisonicotinic acid **25** (in  $\text{D}_6$  DMSO).

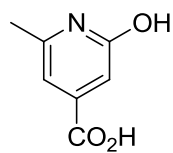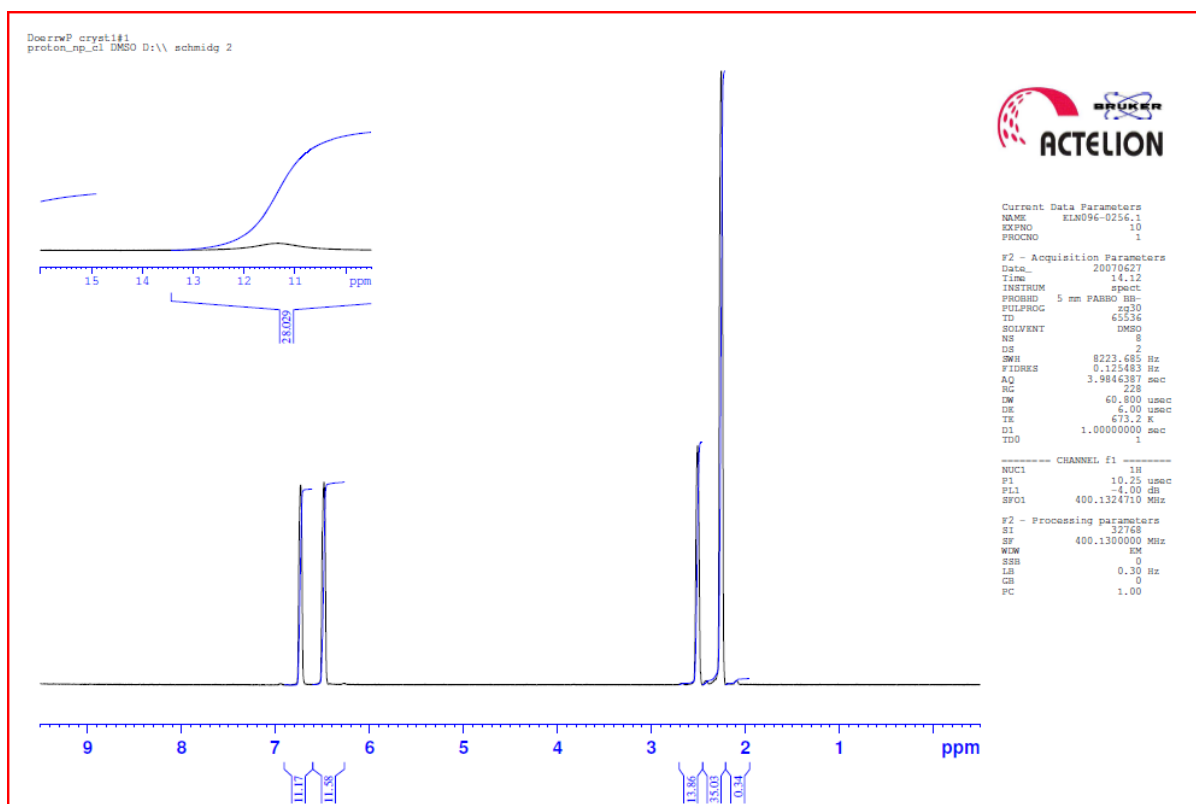

$^1\text{H}$  NMR spectrum of propyl 2-hydroxy-6-methylisonicotinate **26** (in  $\text{D}_6$  DMSO).

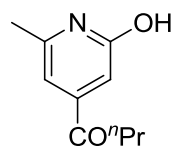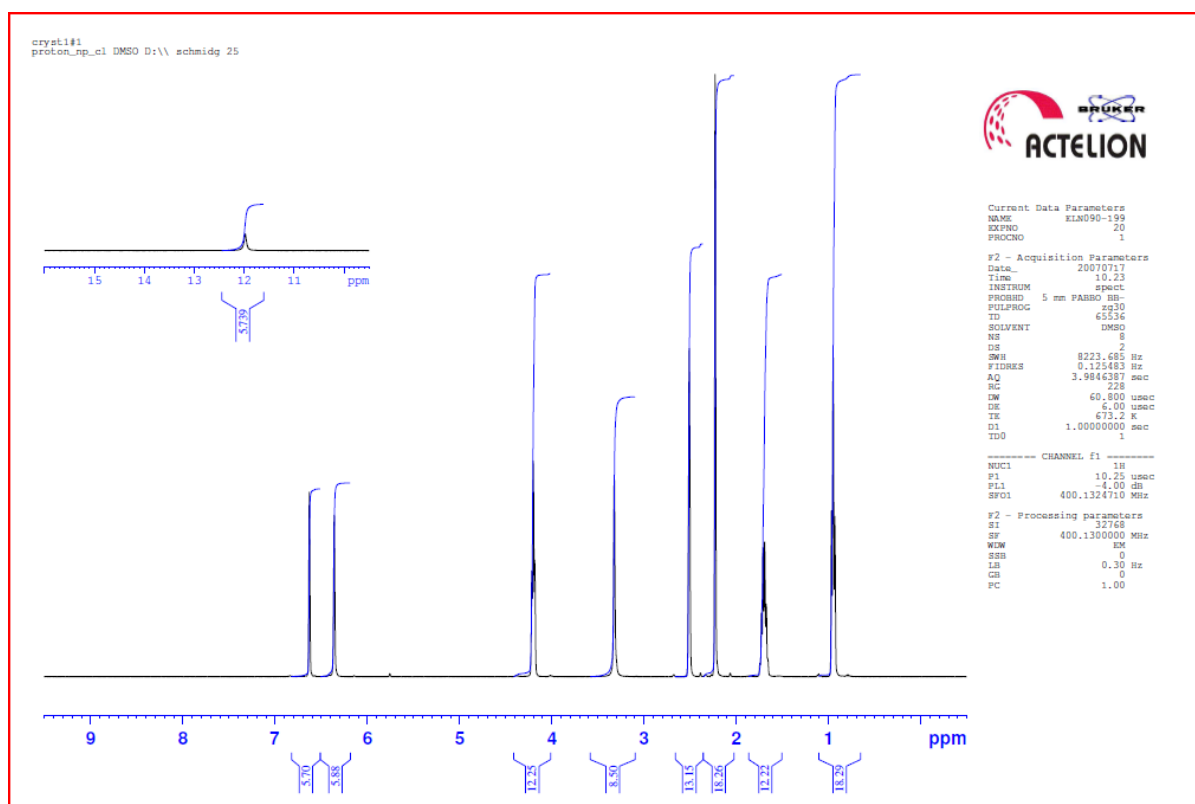

$^1\text{H}$  NMR spectrum of 2-(diethylamino)-6-methylisonicotinic acid hydrochloride hydrate **6** (in  $\text{D}_2\text{O}$ ).

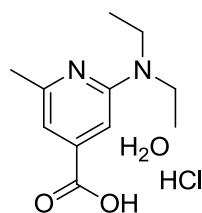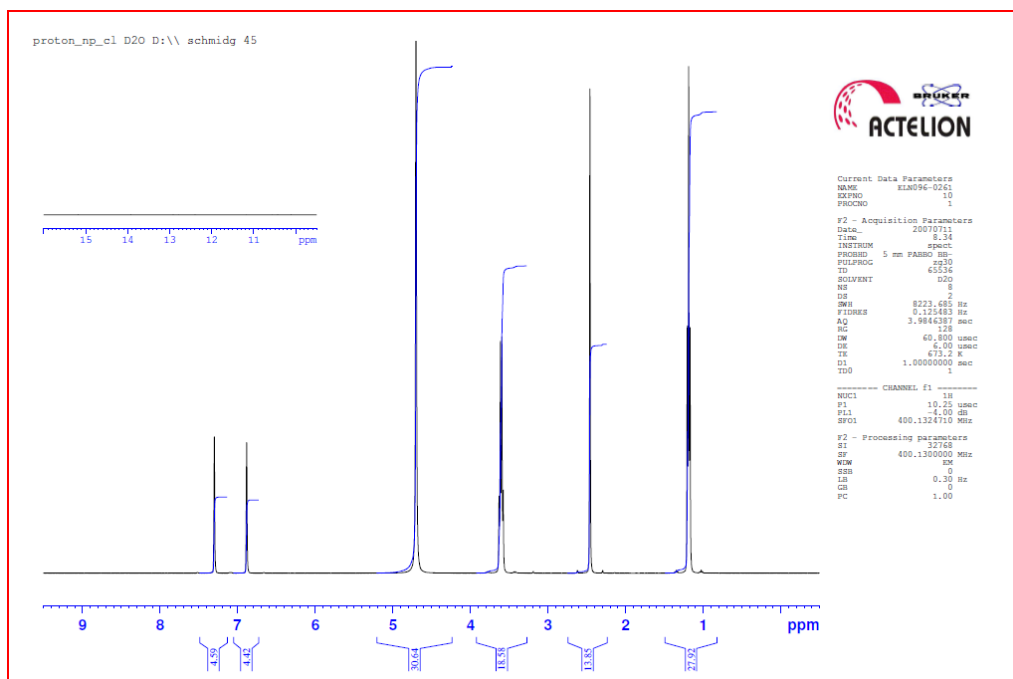

$^{13}\text{C}$  NMR spectrum of 2-(diethylamino)-6-methylisonicotinic acid hydrochloride hydrate **6** (in  $\text{D}_2\text{O}$ ).

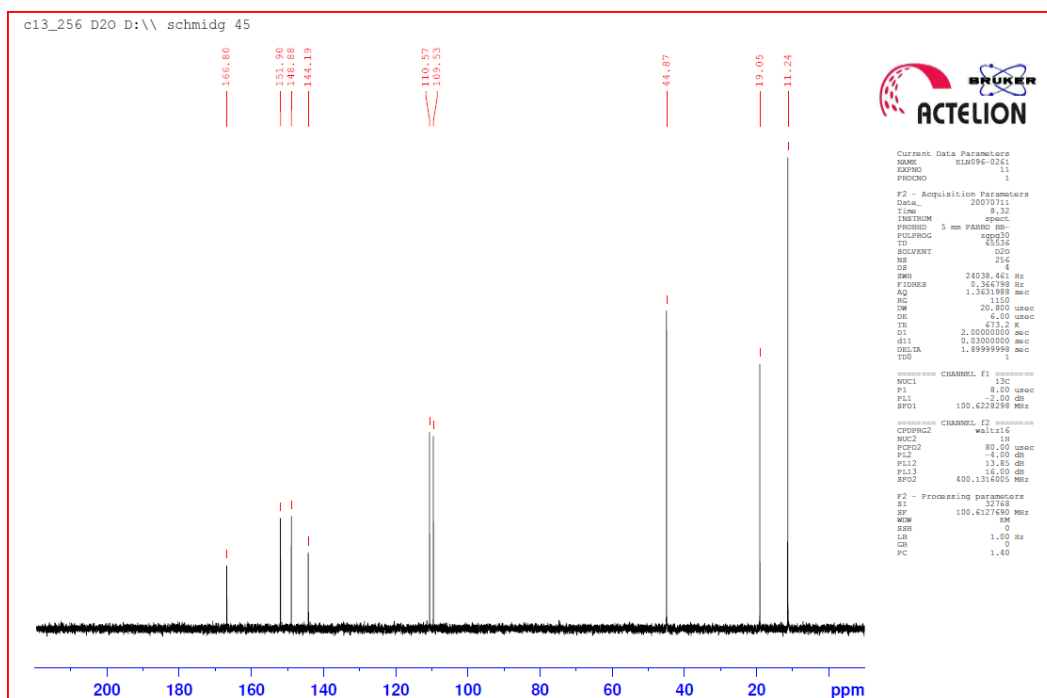

$^1\text{H}$ -NMR spectrum of 4-amino-3-ethyl-5-methylbenzonitrile **31** (in  $\text{D}_6$  DMSO)-

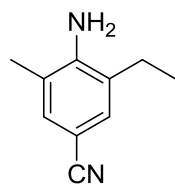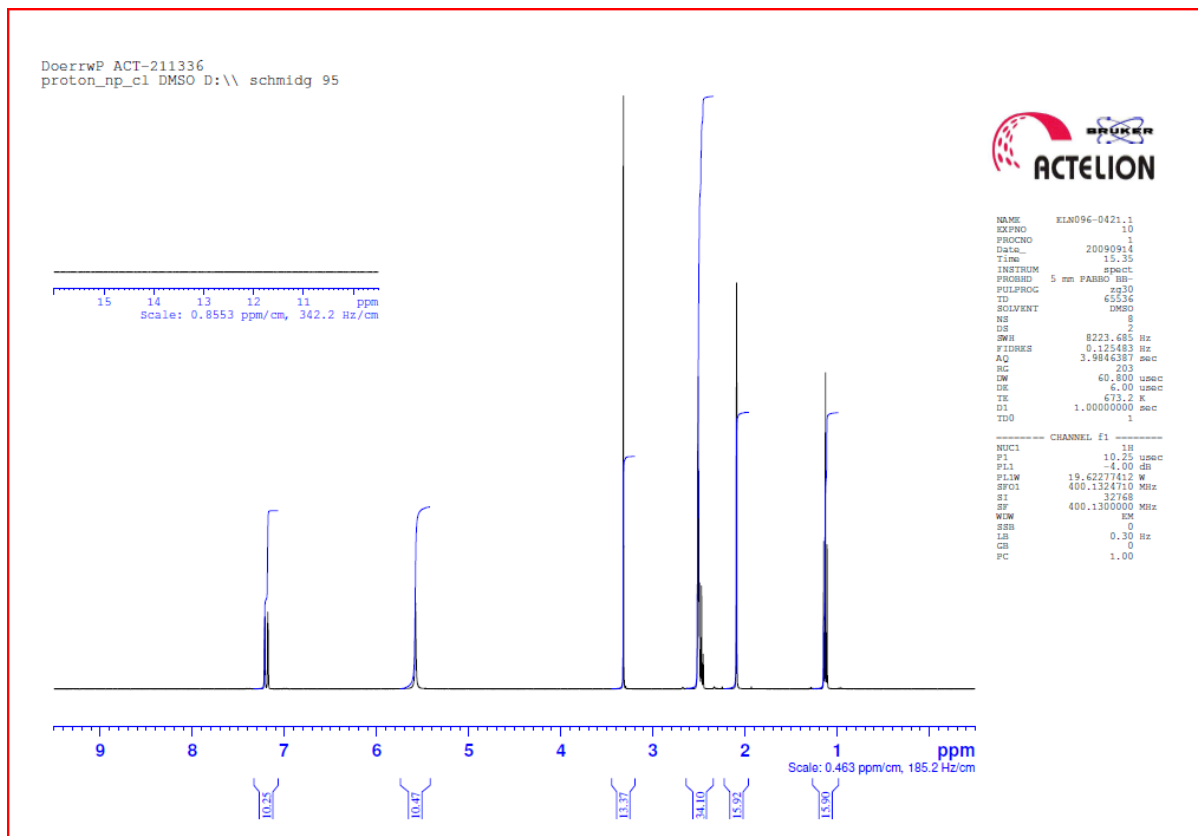

$^1\text{H}$  NMR spectrum of 3-ethyl-4-hydroxy-5-methylbenzonitrile **10** (in  $\text{CDCl}_3$ ).

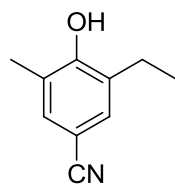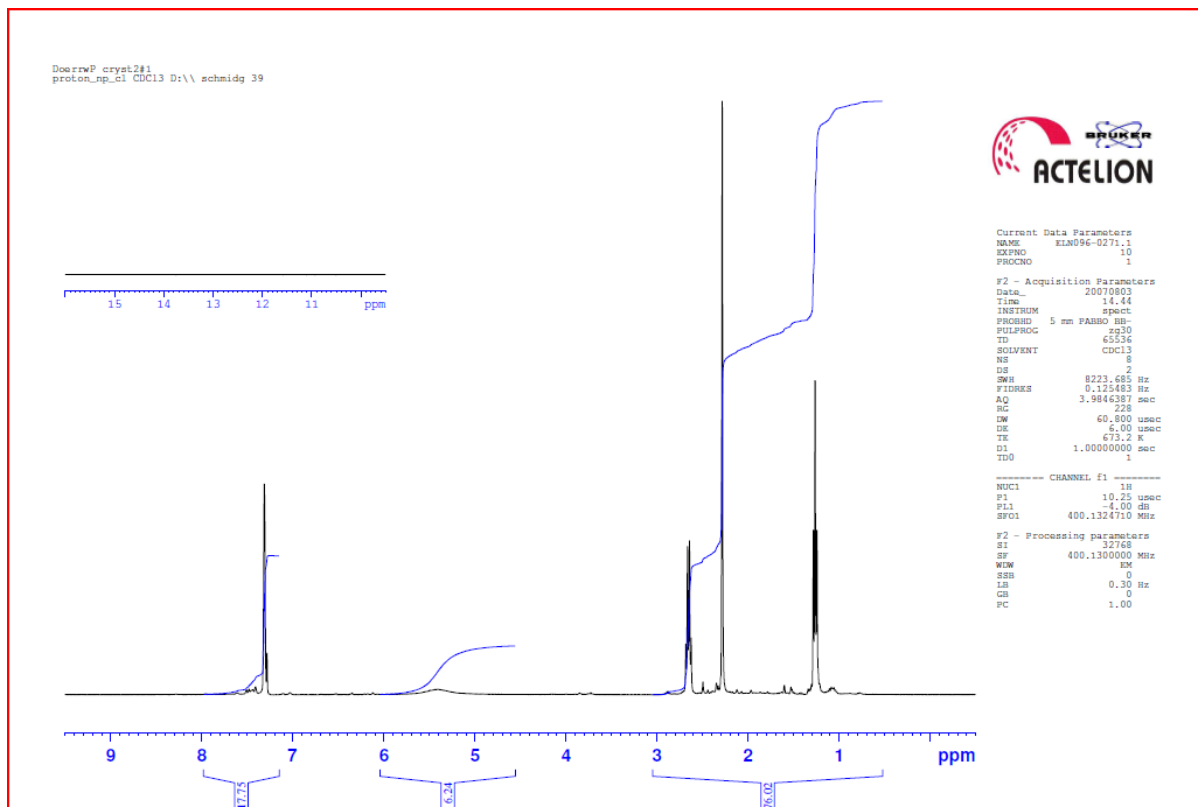

$^1\text{H}$  NMR spectrum of 3-ethyl-N,4-dihydroxy-5-methylbenzimidamide **11** (in  $\text{D}_6$  DMSO).

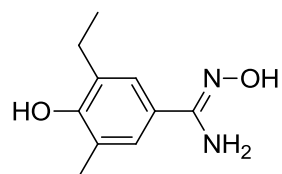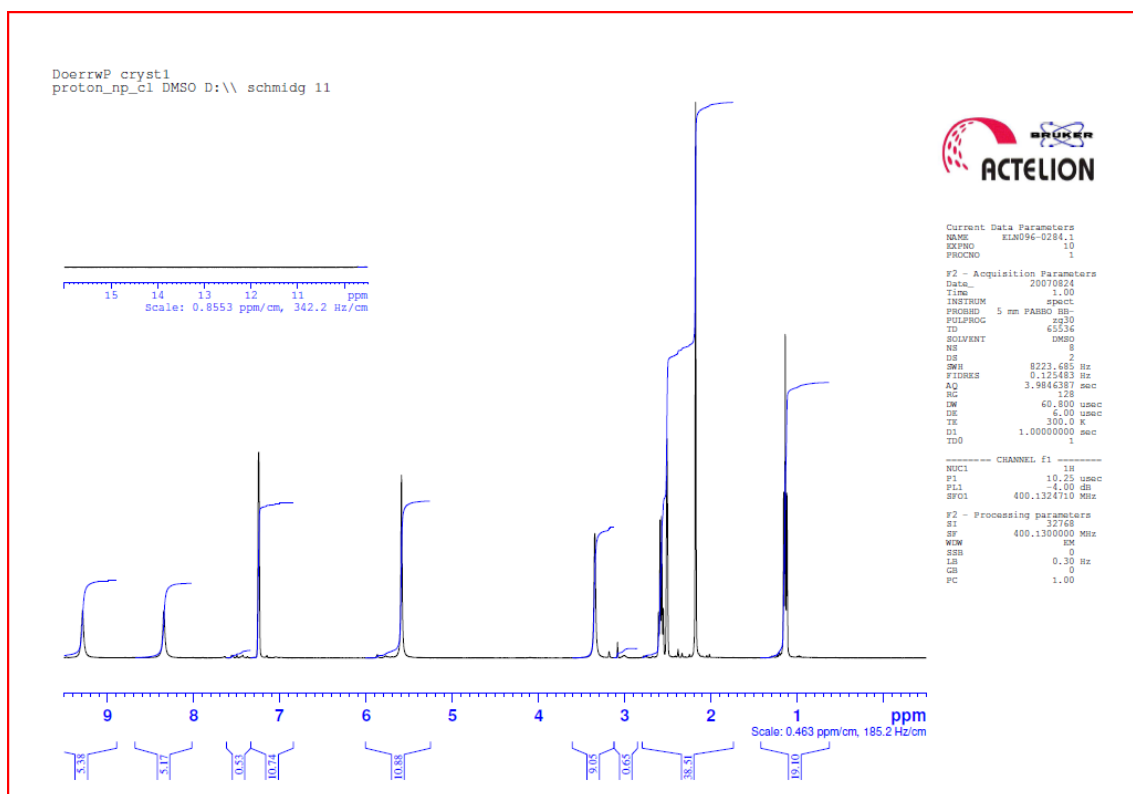

$^{13}\text{C}$  NMR spectrum of 3-ethyl-N,4-dihydroxy-5-methylbenzimidamide **11** (in  $\text{D}_6$  DMSO).

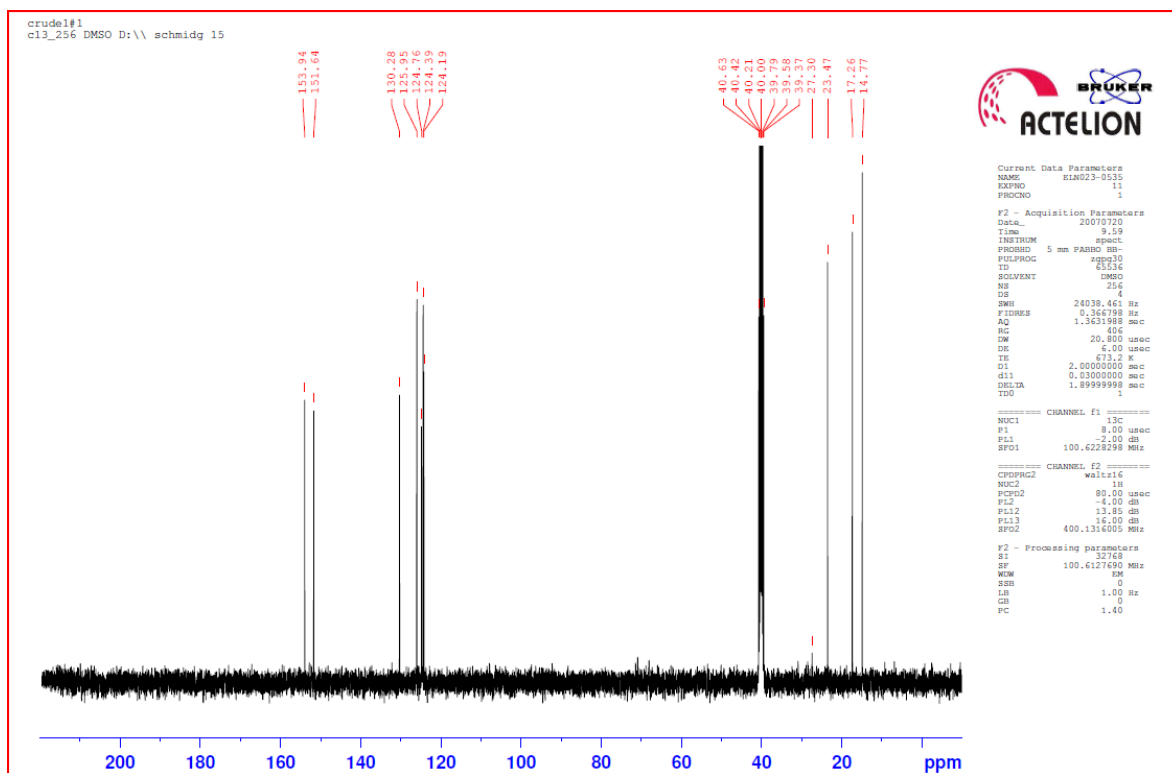

$^1\text{H}$  NMR spectrum of 4-(5-(2-(diethylamino)-6-methylpyridin-4-yl)-1,2,4-oxadiazol-3-yl)-2-ethyl-6-methylphenol **12** (in  $\text{CDCl}_3$ ).

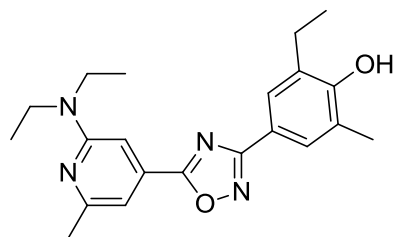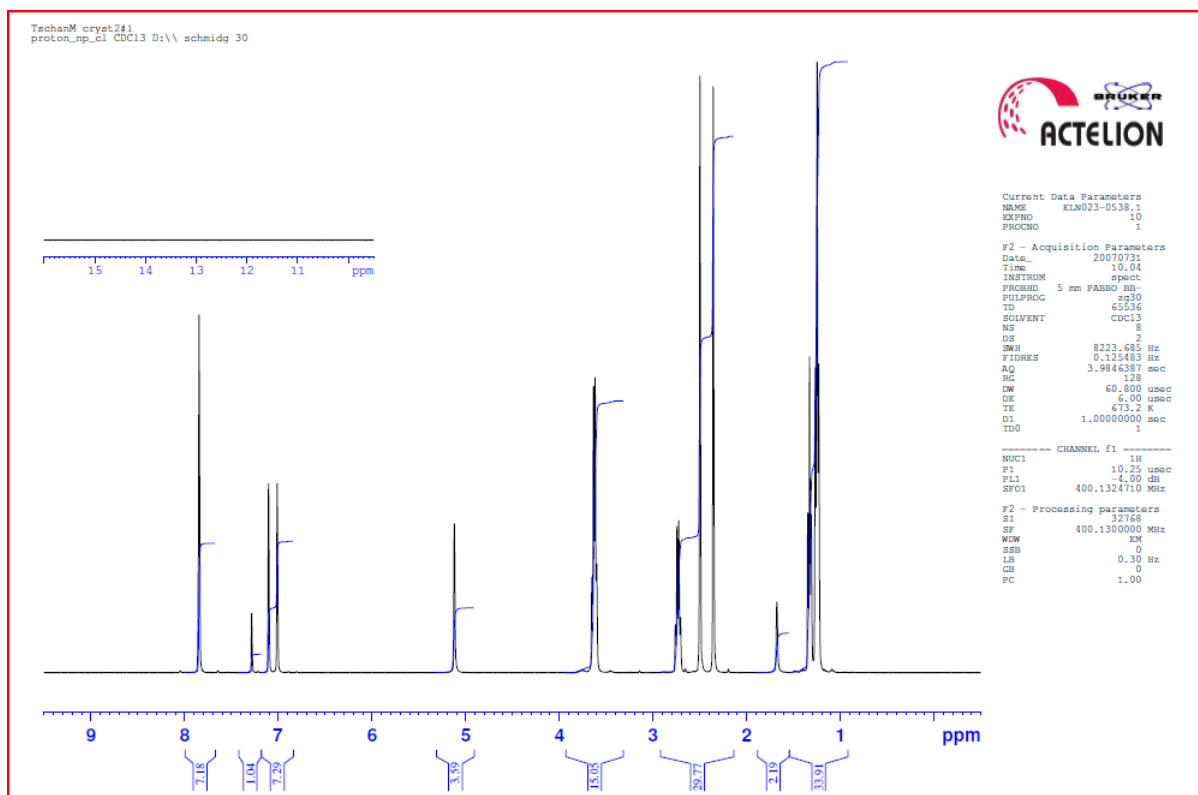

$^1\text{H}$  NMR spectrum of (*S*)-N, N-diethyl-4-(3-(3-ethyl-5-methyl-4-(oxiran-2-ylmethoxy)phenyl)-1,2,4-oxadiazol-5-yl)-6-methylpyridin-2-amine **13** (in  $\text{CDCl}_3$ ).

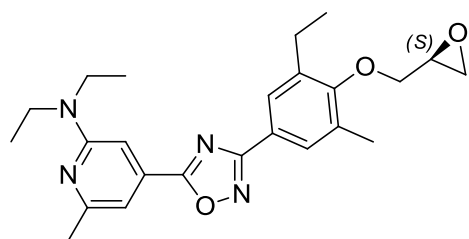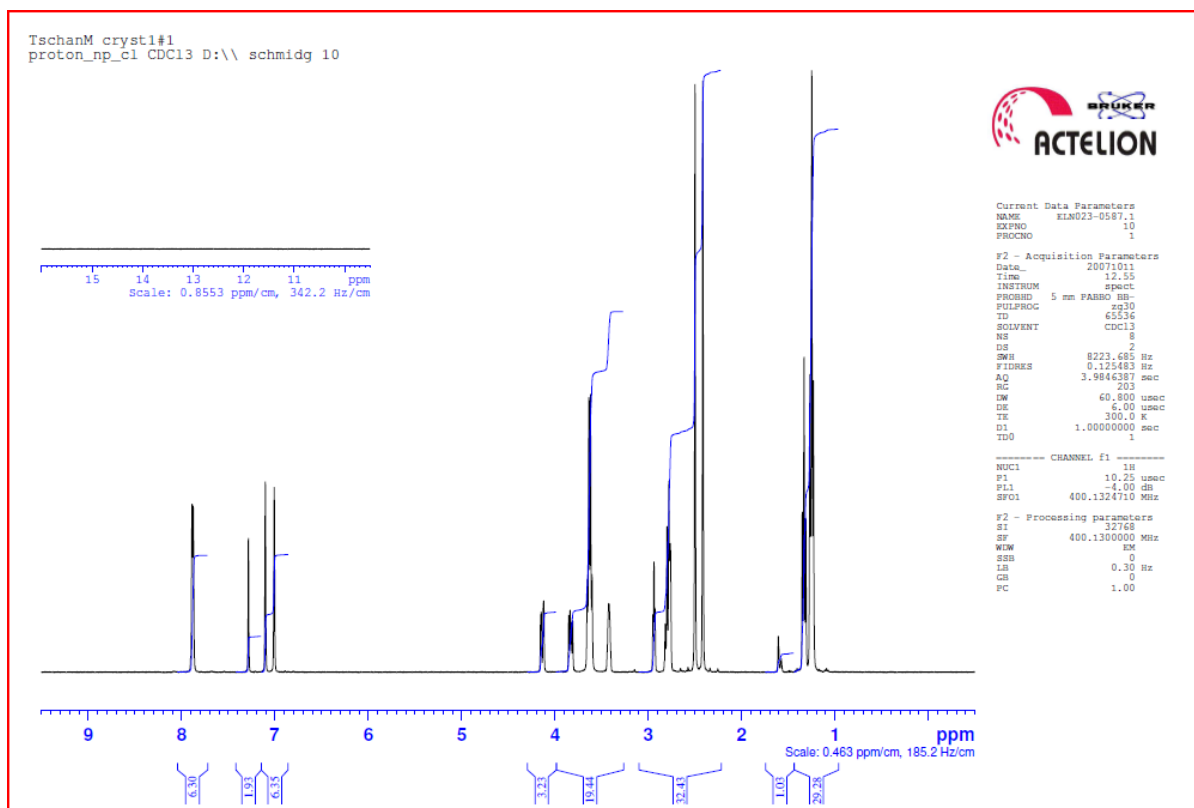

$^1\text{H}$  NMR spectrum of (*S*)-N-(3-(4-(5-(2-(diethylamino)-6-methylpyridin-4-yl)-1,2,4-oxadiazol-3-yl)-2-ethyl-6-methylphenoxy)-2-hydroxypropyl)-2-hydroxyacetamide **1** (in  $\text{D}_6$  DMSO).

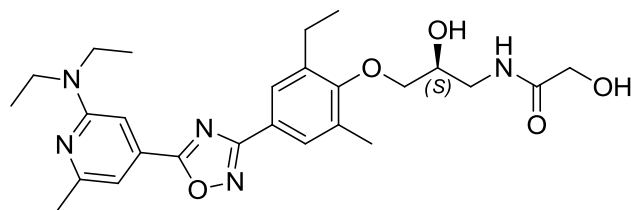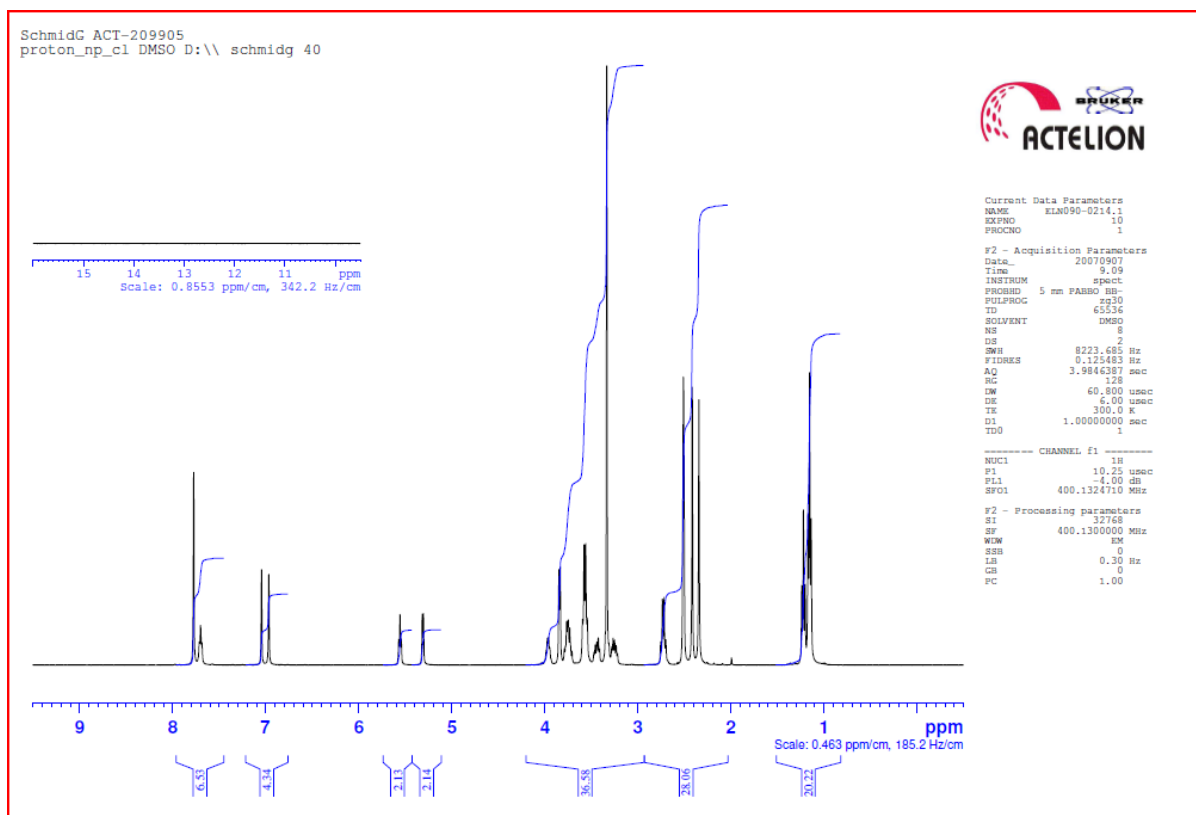

$^{13}\text{C}$  NMR spectrum of (*S*)-N-(3-(4-(5-(2-(diethylamino)-6-methylpyridin-4-yl)-1,2,4-oxadiazol-3-yl)-2-ethyl-6-methylphenoxy)-2-hydroxypropyl)-2-hydroxyacetamide **1** (in  $\text{CDCl}_3$ ).

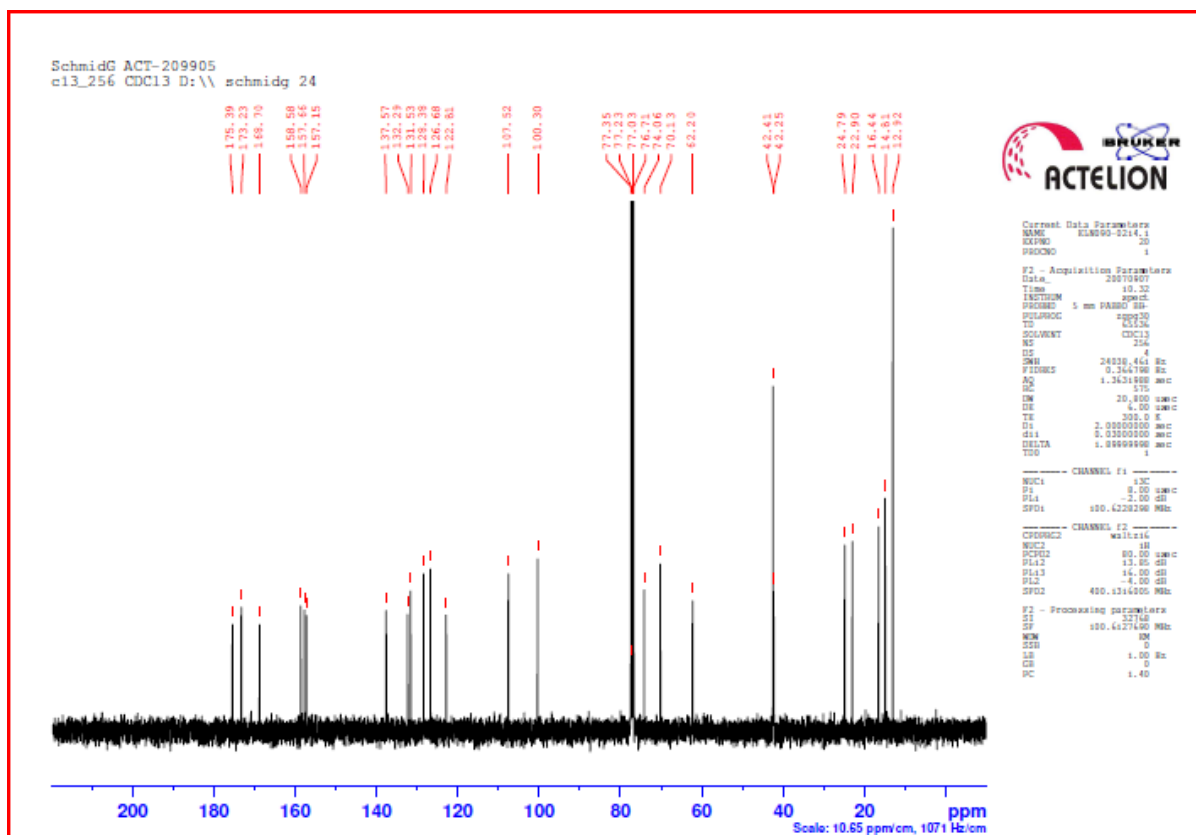

HPLC trace (HPLC method 1) of (S)-N-(3-(4-(5-(2-(diethylamino)-6-methylpyridin-4-yl)-1,2,4-oxadiazol-3-yl)-2-ethyl-6-methylphenoxy)-2-hydroxypropyl)-2-hydroxyacetamide **1**

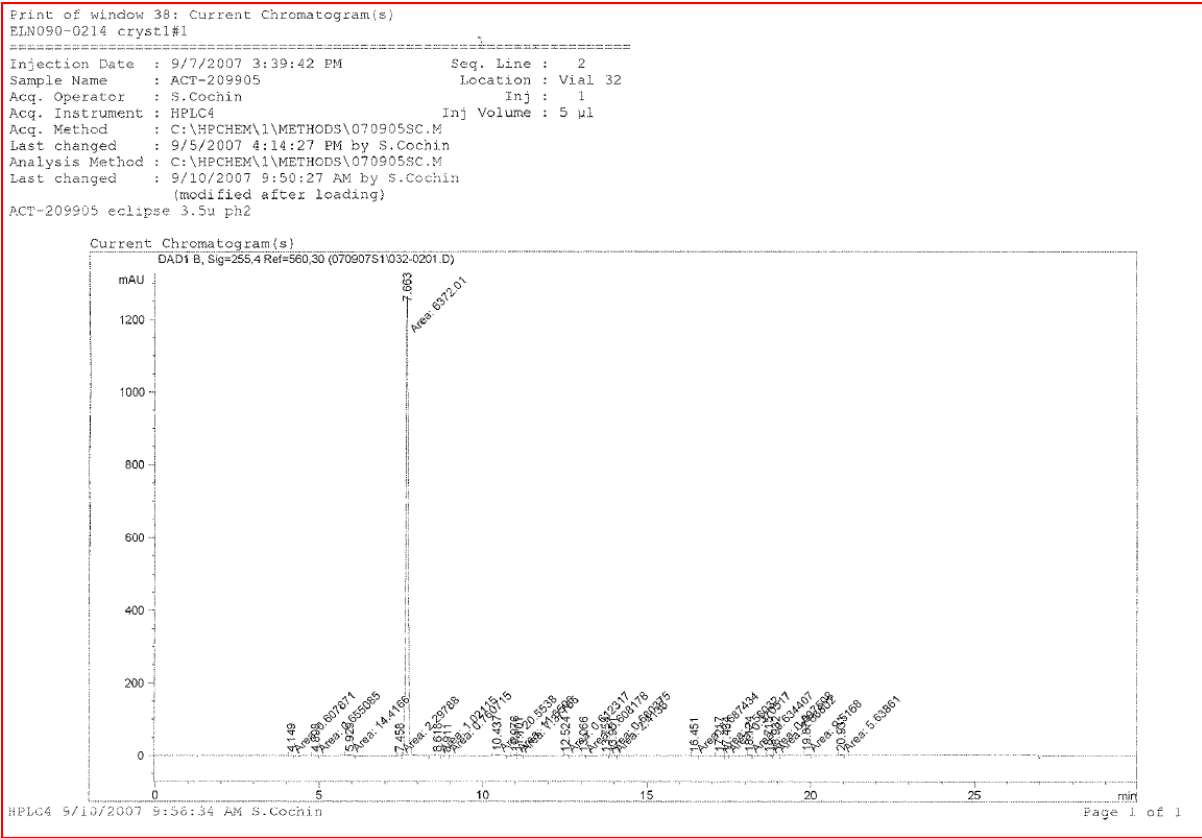

REVERSED PHASE  
10.09.2007

| RT     | RRT  | Area       | Area % |
|--------|------|------------|--------|
| 4.419  | 0.58 | 0.607871   | 0.01   |
| 4.898  | 0.64 | 0.655085   | 0.01   |
| 5.929  | 0.77 | 14.41662   | 0.22   |
| 7.458  | 0.97 | 2.29788    | 0.04   |
| 7.663  | 1.00 | 6372.00781 | 98.66  |
| 8.618  | 1.12 | 1.02115    | 0.02   |
| 8.911  | 1.16 | 0.76072    | 0.01   |
| 10.437 | 1.36 | 20.55378   | 0.32   |
| 10.976 | 1.43 | 11.65056   | 0.18   |
| 11.101 | 1.45 | 7.37765    | 0.11   |
| 12.524 | 1.63 | 0.61232    | 0.01   |
| 13.066 | 1.71 | 0.60818    | 0.01   |
| 13.754 | 1.79 | 0.68038    | 0.01   |
| 13.951 | 1.82 | 2.41360    | 0.04   |
| 16.451 | 2.15 | 0.68743    | 0.01   |
| 17.217 | 2.25 | 2.56032    | 0.04   |
| 17.434 | 2.28 | 0.37052    | 0.01   |
| 18.124 | 2.37 | 0.63441    | 0.01   |
| 18.715 | 2.44 | 0.69750    | 0.01   |
| 18.932 | 2.47 | 2.86802    | 0.04   |
| 19.879 | 2.59 | 9.51680    | 0.15   |
| 20.931 | 2.73 | 5.63861    | 0.09   |
|        |      | 6458.63720 | 100.00 |

| RT     | RRT  | Area        | Area % |
|--------|------|-------------|--------|
| 4.139  | 0.54 | 0.64833     | 0.01   |
| 4.891  | 0.64 | 0.653336    | 0.01   |
| 5.917  | 0.77 | 14.77023    | 0.23   |
| 7.445  | 0.97 | 2.35305     | 0.04   |
| 7.648  | 1.00 | 6402.02588  | 98.64  |
| 8.604  | 1.13 | 1.04532     | 0.02   |
| 8.89   | 1.16 | 0.8598      | 0.01   |
| 10.416 | 1.36 | 21.00886    | 0.32   |
| 10.957 | 1.43 | 11.79776    | 0.18   |
| 11.082 | 1.45 | 7.50646     | 0.12   |
| 12.503 | 1.63 | 0.648527    | 0.01   |
| 13.049 | 1.71 | 0.694111    | 0.01   |
| 13.744 | 1.80 | 0.657952    | 0.01   |
| 13.937 | 1.82 | 2.47687     | 0.04   |
| 16.434 | 2.15 | 0.581887    | 0.01   |
| 17.197 | 2.25 | 2.56998     | 0.04   |
| 17.416 | 2.28 | 0.485589    | 0.01   |
| 18.118 | 2.37 | 0.688632    | 0.01   |
| 18.709 | 2.45 | 0.680639    | 0.01   |
| 18.93  | 2.48 | 2.88383     | 0.04   |
| 19.876 | 2.60 | 9.51533     | 0.15   |
| 20.927 | 2.74 | 5.61082     | 0.09   |
|        |      | 6490.173193 | 100.00 |

| RT     | RRT  | Area     | Area % |
|--------|------|----------|--------|
| 4.279  | 0.56 | 0.628    | 0.01   |
| 4.895  | 0.64 | 0.654    | 0.01   |
| 5.923  | 0.77 | 14.593   | 0.23   |
| 7.452  | 0.97 | 2.325    | 0.04   |
| 7.656  | 1.00 | 6387.017 | 98.65  |
| 8.611  | 1.12 | 1.033    | 0.02   |
| 8.901  | 1.16 | 0.815    | 0.01   |
| 10.427 | 1.36 | 20.781   | 0.32   |
| 10.967 | 1.43 | 11.724   | 0.18   |
| 11.092 | 1.45 | 7.442    | 0.11   |
| 12.514 | 1.63 | 0.630    | 0.01   |
| 13.058 | 1.71 | 0.651    | 0.01   |
| 13.749 | 1.80 | 0.669    | 0.01   |
| 13.944 | 1.82 | 2.445    | 0.04   |
| 16.443 | 2.15 | 0.635    | 0.01   |
| 17.207 | 2.25 | 2.565    | 0.04   |
| 17.425 | 2.28 | 0.428    | 0.01   |
| 18.121 | 2.37 | 0.662    | 0.01   |
| 18.712 | 2.44 | 0.689    | 0.01   |
| 18.931 | 2.47 | 2.876    | 0.04   |
| 19.878 | 2.60 | 9.516    | 0.15   |
| 20.929 | 2.73 | 5.625    | 0.09   |
|        |      | 6474.405 | 100.00 |

HPLC trace (HPLC method 2) of (S)-N-(3-(4-(5-(2-(diethylamino)-6-methylpyridin-4-yl)-1,2,4-oxadiazol-3-yl)-2-ethyl-6-methylphenoxy)-2-hydroxypropyl)-2-hydroxyacetamide **1**

Data File C:\CHEM32\1\DATA\070907SC\061-0301.D  
Sample Name: ACT-209905

```
=====
Acq. Operator   : S.Cochin                      Seq. Line :    3
Acq. Instrument : HPLC7                        Location  : Vial 61
Injection Date  : 07.09.2007 15:29:33           Inj       :    1
                                           Inj Volume: 5 µl

Acq. Method     : C:\CHEM32\1\METHODS\070802SC.M
Last changed    : 06.09.2007 17:36:38 by S.Cochin
Analysis Method : C:\CHEM32\1\METHODS\070802SC.M
Last changed    : 10.09.2007 10:00:12 by S.Cochin
                  (modified after loading)
Method Info     : act-209905
```

Sample Info : ELN090-0214 cryst1#1

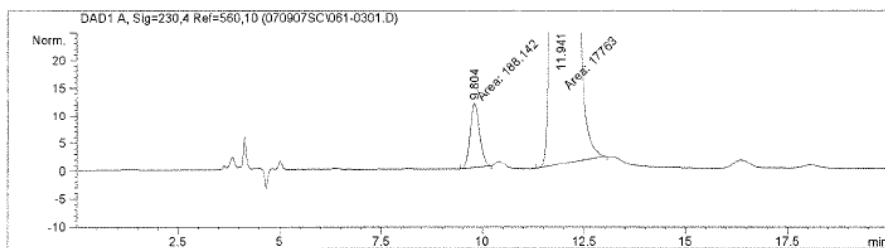

Area Percent Report

```
=====
Sorted By      : Signal
Multiplier     : 1.0000
Dilution       : 1.0000
Use Multiplier & Dilution Factor with ISTDs
```

DSC of (S)-N-(3-(4-(5-(2-(diethylamino)-6-methylpyridin-4-yl)-1,2,4-oxadiazol-3-yl)-2-ethyl-6-methylphenoxy)-2-hydroxypropyl)-2-hydroxyacetamide **1**

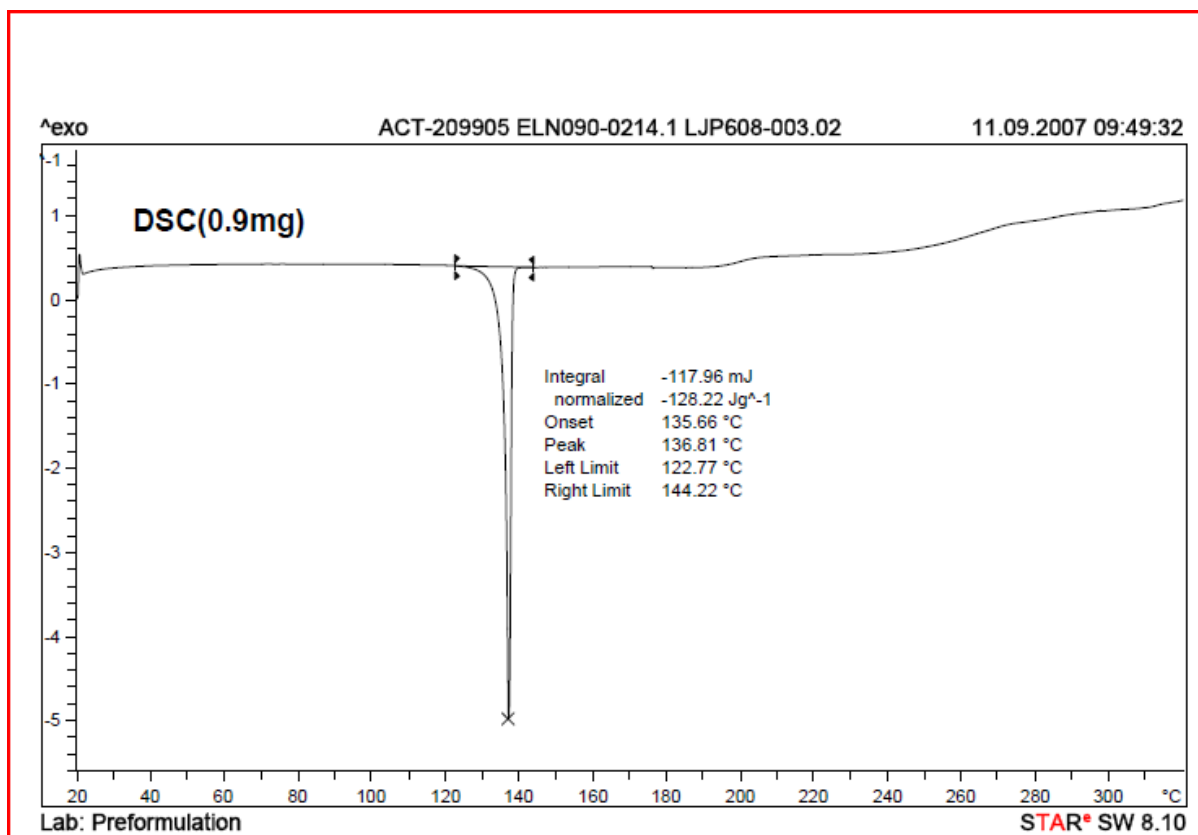

### 3. Examples of procedures on 400-L scale (6, 11, 12)

#### 2-(Diethylamino)-6-methylisonicotinic acid hydrochloride hydrate (6)

A 400-L enamelled reactor was charged with DCM (156 L), propyl methylisonicotinate **26** (21.277 kg, 109.2 mol, 1.0 equiv) and pyridine (13 L). The mixture was cooled to - 5 °C. Triflic anhydride (34.02 kg, 1.1 equiv) was added in 125 min at below 5 °C. The mixture was heated to 20 °C and stirred for 45 min. IPC showed 0.1 % a/a of **26**. The reaction mixture was washed with water (100 L). The organic layer (183 L) was concentrated to a minimum stirring volume at 60–70 °C (128 L solvent removed). The water content of a sample of the residue was 0.01 % w/w (Karl Fischer titration). DMSO (100 L) and Et<sub>2</sub>NH (112.5 L) were added to the residue. The solution was heated to 50 °C for 17 h. IPC showed 0.6 % a/a of **27**. The temperature was increased to 125 °C and solvent and Et<sub>2</sub>NH (61 L) were distilled off. The mixture was cooled to 30 °C and diluted with TBME (144 L). The solution was washed with water (151 L) and 8.3 w/w% HCl (6.5 L). The aqueous layer had a pH of 6.7 and was discarded. The organic layer was washed with water (50 L). IPC of a sample showed no diethylamine present (<sup>1</sup>H NMR). Solvent (102 L) was distilled off at 90 °C jacket temperature. The mixture was treated with 25% HCl (83 L) at 20 °C and heated to 145 °C while 1-propanol and aqueous HCl were distilled off (74 L solvents were distilled off). IPC showed 0.2% a/a of **28**. The mixture was cooled to 30 °C. To the suspension was added acetone (85 L) at 30 °C. The suspension was cooled to 1 °C and aged for 9.5 h. The suspension was filtered over a 50 L glass nutsche with Teflon filter cloth 36 µm in 15 min. The solid was washed with acetone (2 x 18 L). The yellow solid **6** was dried on the nutsche with a slight stream of nitrogen for 47 h. Yield: 18.007 kg (74%). <sup>1</sup>H NMR assay: 100% w/w. The residue in the reactor was dissolved with methanol (100 L). The solution was concentrated on a rotavapor at 40 °C and reduced pressure to obtain 3.164 kg (15%) of **6** with a <sup>1</sup>H NMR assay of 94% w/w.

**3-Ethyl-N,4-dihydroxy-5-methylbenzimidamide (11).** A 400-L enamelled reactor was charged with nitrile **10** (20.925 kg, 130 mol, 1 equiv),  $\text{NH}_2\text{OH}\cdot\text{HCl}$  (22.555 kg, 2.5 equiv),  $\text{Et}_3\text{N}$  (45 L, 2.5 equiv) and MeOH (176 L). The mixture was heated to 65 °C for 7.5 h. The mixture was cooled to 20 °C and 8.9 w/w% HCl (96.4 L) was added to obtain a pH of 1.79. The brown solution was concentrated at 44 °C internal temperature and reduced pressure (172 L solvent removed). The residue was washed with TBME (2 x 100 L). The organic layers were discarded. The pH of the aqueous layer was adjusted to 7.12 by addition of 30% NaOH (23 L). The resulting suspension was cooled to 2 °C and filtered. The cake was washed with water (25 L). The product was dried on the nutsche for 7.5 d with a slight stream of nitrogen. Yield (**11**): 23.16 kg (92%).  $^1\text{H}$  NMR assay: 95% w/w.

**4-(5-(2-(Diethylamino)-6-methylpyridin-4-yl)-1,2,4-oxadiazol-3-yl)-2-ethyl-6-methylphenol (12).** A 400-L enamelled reactor was charged with isonicotinic acid **6** (21.058 kg, 80.151 mol),  $\text{HOBt}\cdot\text{H}_2\text{O}$  (1.229 kg, 0.1 equiv), hydroxy-benzamidine **11** (16.3957 kg, 15.5677 kg assay corrected, 1 equiv),  $\text{Et}_3\text{N}$  (8.16 kg, 1 equiv) and THF (156 L). The mixture was cooled to 0 °C. A solution of DCC (18.2 kg, 1.1 equiv) in THF (60 L) was added to the mixture at 0 °C for 152 min. The mixture was stirred at 0 °C for 8 hours. The suspension was heated to 20 °C in 8 h and stirred at 20 °C for 3 h. The suspension was heated to reflux for 21 h and then concentrated at 75 °C whereby THF (145 L) was removed. TBME (109.5 L) was added to the residue and the mixture was cooled to 0 °C. The urea was filtered off and washed with TBME (3 x 8.5 L). The combined filtrates were washed with 3.7 w/w% aq  $\text{NaHCO}_3$  solution (2 x 54 L) and water (56 L). The organic layer (170 L) was concentrated at normal pressure and 120 L solvent was removed. Acetonitrile (211 L) was added and distillation was continued (internal temperature 65-70 °C, 139 L solvent distilled off). Acetonitrile (141 L) was added and distillation was continued (internal temperature 70-80 °C, 65 L solvent distilled off). The mixture was cooled to 60 °C within 1 h and to 5 °C within 5 h. The suspension was aged for 9 h. The suspension was filtered and the cake was washed with cold acetonitrile (32 L). The cake was dried on the nutsche with a slight stream of nitrogen for 112 h. Yield (**12**): 20.32 kg (69%).  $^1\text{H}$  NMR assay: 93% w/w.
